# Supplementary material
Source: PubMed Central journal article supplement (PMC1435803)
Supplement: plntphys_pp.105.073817_2.pdf [file plntphys_pp.105.073817_2.pdf]

## SUPPLEMENTAL FIGURE LEGENDS

**Supplemental Figure 1.** Certain npcRNA genes are present within highly dense genomic environments. Distances of five npcRNA genes relative to neighbouring genes (as annotated in TAIR) are indicated. Positions of ATG and STOP codons are indicated for the latter. In some cases, 5' and 3'UTRs are lacking from TAIR annotations. The At3g19960 gene encoding a myosin-like protein is located 23 nt upstream of the npcRNA 43 gene. Arrowheads indicate the position of the Myos-43-Fw (5'-GATGTTCTTGAGACAACCTCGT-3') and Myos-43-Rev (5'-GATGAAGATATTACTCCTCGATCAAT-3') primers (size of primers are not on scale) that failed to amplify a PCR product in all tissues analyzed.

**Supplemental Figure 2.** Secondary RNA structures proposed for npcRNA fragments having statistically significant Z-scores (see Table 2). Arrows indicate the 5' end and the direction of transcription.

**Supplemental Figure 3.** Other npcRNAs broadly expressed in different *A. thaliana* tissues.

**A,** npcRNAs with comparable levels in the different plant tissues analysed. Total RNA from roots, rosettes, stems, cauline leaves, inflorescences and cell suspensions was assayed by semi-quantitative RT-PCR. **B,** npcRNAs difficult to detect in most tissues, due to low transcript levels or low amplification efficiency of primer pairs. **C,** Two RT-PCR products were obtained for npcRNA 62. Cloning and sequencing of these two PCR products allowed us to position a 98 nt intron in the 3' region of the corresponding gene. The star indicates the PCR product corresponding to the spliced RNA. +/-: RT-PCR performed with or without reverse transcriptase. Control PCRs performed on water (w) or genomic DNA (gDNA) are shown.

**Supplemental Figure 4.** Abundance of npcRNA 78 splicing variants in different plant tissues. RT-PCR detection of different npcRNA 78/*MIR162a* transcripts in roots, rosettes, stems, cauline leaves, inflorescences and cell suspensions, as well as in phosphate starved or cytokinin-treated roots. RT-PCR was performed using npcRNA 78 specific primers located in exons 2 and 4 (78E2F/78E4R).

**Supplemental Table I.** npcRNA primer pairs used in RT-PCR experiments.

| <b>npcRNA primer pairs</b>                                          |
|---------------------------------------------------------------------|
| 2-Fw TGGCTTCTAGGATTGTTGA<br>2-Rev AGAGATTGAAGTAATCCACCC             |
| 4-Fw ATGGTTGAGTACTGACCGGG<br>4-Rev TGTGGGTACACCATCTTTTT             |
| 14d3 AAGACATAAGCCGGCGAGTA<br>14d5 CAGAGGCGAGTTCTTTCACC              |
| 15f3 AAGCTTTCGGACATCACCAC<br>15f5 TTGATTTCGTTTTGCAACCAG             |
| 21-Fw TATTCCTCGGTGGATAAAGGT<br>21-Rev AAGAGAACCCACACACCAAT          |
| 26-Fw ATCCGACTTTGGTTCAGGTGT<br>26-Rev CAAAATTCAGCCCTTCAAACC         |
| 29-Fw AGTTCTTTATGCCTTTCTCGGGTC<br>29-Rev GAAGCCTCTGCCTACAAAGGG      |
| 30-Fw CATCTAATTGCCATAATCGG<br>30-Rev GATAAGCTTAAGACGTGTCAG          |
| 33d3 ACATCGCATCACATCACACA<br>33d5 AACCAAACCTCATCCTTCACTTCA          |
| 34d3 ACAGCGGTGCCACCTATTAC<br>34d5 CCTCTTGATCCGGTCATGTT              |
| 40-Fw TATACATGGTTGCTGTAGAGAGACA<br>40-Rev GCGATAACACAAATCGTATGTTTCA |
| 41-Fw TAAGGAAAACATAACCTCCG<br>41-Rev AGAAAGAGATGGGGTCTTACA          |
| 43-Fw GCTATCTATCTTTCGGATTGGA<br>43-Rev GACACGTGTAGAAGACGTATATTG     |
| 48a3 TTACTTCCAGTCAACGGCAT<br>48a5 GTTCATTGCAAAAGGCGAT               |
| 52_Fw GATTTTCTTGTGTCGCTTATCATGG<br>52_Rev GAGTAATCACAAGTTTTTCCGGC   |
| 58d3 TGATGTCTGGGAAATTGGTG<br>58-Rev AAGGCTCATGTATCAAACCCGAGAT       |
| 60-Fw TCCCCTAGGCTCCAACCTTT<br>60-Rev AAAAGTGTGACCACAAGCAG           |
| 62d3 TGTGCTGACTTGGAACACT<br>62d5 GCCCTTCTGACCACCAACTA               |
| 72d3 AACCGGGATATACCACGTCA<br>72d5 TCGGATTTATGTTGGGGTA               |
| 75e3 CACAGCTTAACCCACCCAAT<br>75e5 AGAGGTGGATCGTGGATCAG              |
| 78E5F GTGAAATCAATTGCAGTCTCCT<br>78E5R CAAGGCATGGCAGAGTTTACA         |
| 79_Fw TTAGCTGGAAATGGTTGTC<br>79_Rev GGAAAATGCTTGATTGTGTG            |
| 82d5 AATTTTCGCCATTTTGTTC<br>82e3 CAGTTGAACGCACATCGACT               |
| 83-Fw AAGGCTTTGTTTCTGATGAAGG<br>83-Rev AGAGGTACCCACCATTGTAATTCTA    |
| 111-Fw AATAACAGGTAACAGAGGAGG<br>111-Rev CTGTTATCCACCGGAGTAG         |

|                                   |
|-----------------------------------|
| 113d3 CAACAAAGCAAAGCGTTGAA        |
| 113d5 CAAGAGTGAAGCGTCCATGA        |
| 131d3 GGTGCTGAAGACACGTGAGA        |
| 131d5 CTTTGTCTACGGCGAGGTTTC       |
| 149-Fw GATTCTGGACATTTTCTGCT       |
| 149-Rev AGCCAAGTGAACAGACCCA       |
| 150b3 GCCTACAACGATTGTGCAGCAAGA    |
| 150b5 GATGACTTATCGGCATGTGTTACAGTT |
| 155d3 AATCTCACCCATAGCTAAAACAAA    |
| 155d5 ACAATGGCCATCGAAAAGAG        |
| 156b3 CTGAATAAAGCTACAAAGGGC       |
| 156b5 GTTTTCCGACGACGTTCTATGA      |
| 157-Fw GACGGCGGCTAGGGTTTG         |
| 157-Rev TTTCTCACTACCTTTGTCAATCTC  |
| 311-Fw ACAGAGGAACCTCAGTTTGG       |
| 311-Rev TCAAGATCCACTATAACCACC     |
| 325-Fw TGGGAGATTCAATATCGTTG       |
| 325-Rev GCATGGCTTCTATAATTACC      |
| 326b3 CAAAACATTTACAAAGCCCAAACCC   |
| 326b5 CCTCACCGTCAACAAATGTA        |
| 351_Fw TAGATGTAATCGGTGGTGGAGTC    |
| 351_Rev ACCTATCCACGCGTCAGG        |
| 370-Fw AGTCACGCTTTTCTTTTCGGCTT    |
| 370-Rev GCCTTTGTCACCCTCGCC        |
| 375f3 TTCGAATCCGGACTCACTTC        |
| 375f5 GGCACCTTCAAAGAGCTGAC        |
| 415f3 AGTCACCAACCGACTCATCC        |
| 415f5 TGGTTCCGATGGTTAGATCC        |
| 431-Fw ACAAATTAGTGCCTGAGGCCG      |
| 431-Rev AAGAACGTCTCTGCTTTGACAG    |
| PLS-Fw GGAGACAGGAAAGGGACGG        |
| PLS-Rev CATCCTAGACAAGACACTGACATAG |
| DVL20-Fw TCTTTCTCCGTCTTCTCACATTTC |
| DVL20-Rev CCATGTGGCTACACTTCGC     |
| RPL41-Fw TCCATAGGACGTGTCTCAAAA    |
| RPL41- Rev CCAGAACTGCATCTAGTGG    |

**Supplemental Table II.** Other primer pairs used in RT-PCR experiments.

| RNA                            | Primer pairs                                                                                                                                                                                                                                    |
|--------------------------------|-------------------------------------------------------------------------------------------------------------------------------------------------------------------------------------------------------------------------------------------------|
| <i>β-TUBULIN4</i>              | beta-tub_4_Fw 5'-GCTTACGAATCCGAGGGTGCC-3'<br>beta-tub_4_Rev 5'-GTCCAGTGTCTGTGATATTGCACC-3'                                                                                                                                                      |
| <i>ACTIN2</i>                  | actin2-Fw 5'-GCACCCTGTCTTCTTACCG-3'<br>actin2-Rev 5'-AACCCCTCGTAGATTGGCACA-3'                                                                                                                                                                   |
| <i>DICER-LIKE1</i>             | DCL-cleav-F 5'-GAGTTCGCGATTCTTTTTGG-3'<br>DCL-cleav-R 5'-CCCTTGAAAGCAAGAGATGC-3'                                                                                                                                                                |
| <b>miRNA precursor primers</b> |                                                                                                                                                                                                                                                 |
| RNA                            | Primer pairs                                                                                                                                                                                                                                    |
| npcRNA 78/<br>pri-miR162a      | The primers used for pri-miR162a amplification using semi-quantitative RT-PCR are the same as those mentioned in Materials and Methods as 78E2F and 78E4R.<br>Real-time RT-PCR was performed using 78E5F and 78E5R (see Supplementary Table I). |
| pri-miR162b                    | pri-miR162b-F1 <sup>a</sup> 5'-TGCATCTATCCACCTCTCTCTG-3'<br>pri-miR162b-R1 <sup>b</sup> 5'-CGAATCCATTGTCTGCTTC-3' (for qRT-PCR)<br>or pri-miR162b-R2 <sup>c</sup> 5'-TTGGATTCACTGGCTCAACA-3'                                                    |
| pri-miR172b                    | pri-miR172b-Fw 5'-CGGATTAGGGCGTTAATTACAATG-3'<br>pri-miR172b-Rev 5'-GGTCTCTGGACGAACTATTCTGTA-3'                                                                                                                                                 |

<sup>a</sup> F1 primer position: 3 nucleotides upstream of the 5' end of the *MIR162b* primary transcript mapped by Xie et al. (2005) using 5'RACE (see GenBank accession DQ063621 for the sequence of the 467 nucleotide long primary transcript described by these authors).

<sup>b</sup> R1 primer position: 147 nucleotides upstream of the 3' end of the primary transcript mapped using 3'RACE by Xie et al. (2005).

<sup>c</sup> R2 primer position: 258 nucleotides downstream of the 3' end of the primary transcript mapped using 3'RACE by Xie et al. (2005).
