# Supplementary material
Source: PubMed Central journal article supplement (PMC1435803)

Supplemental Data 2

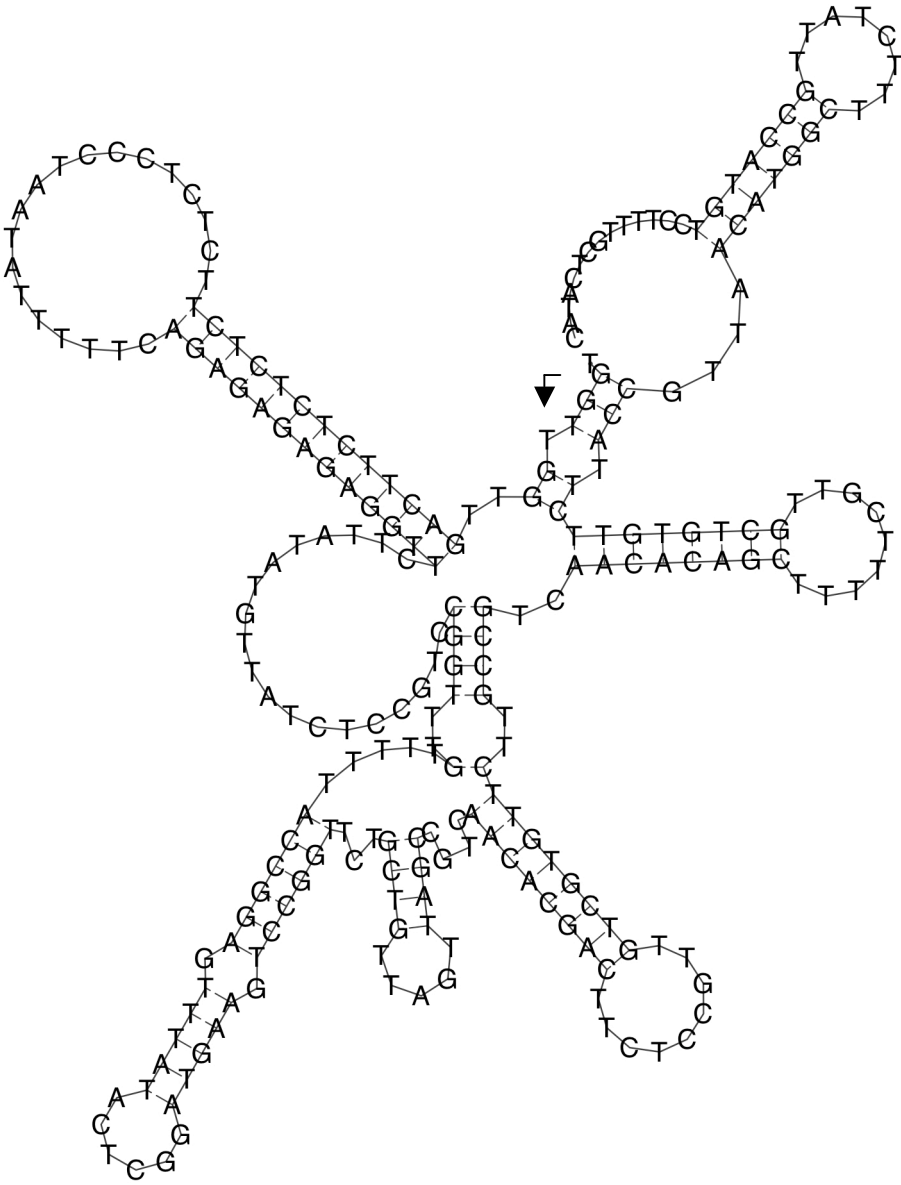

**npcRNA 2 (21-261)**

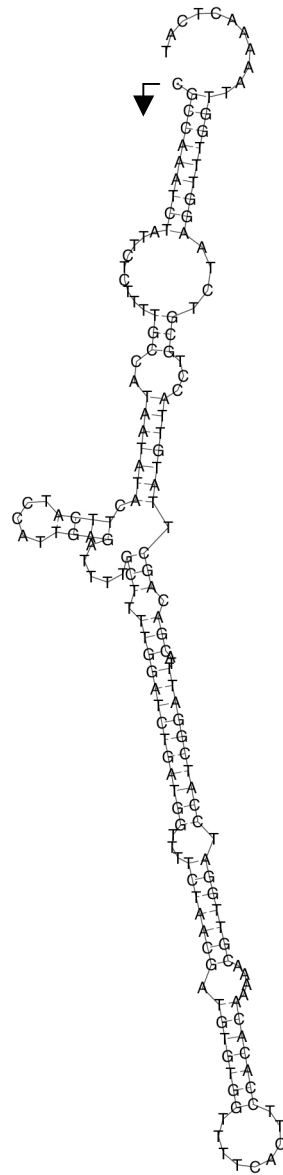

**npcRNA 2 (281-471)**

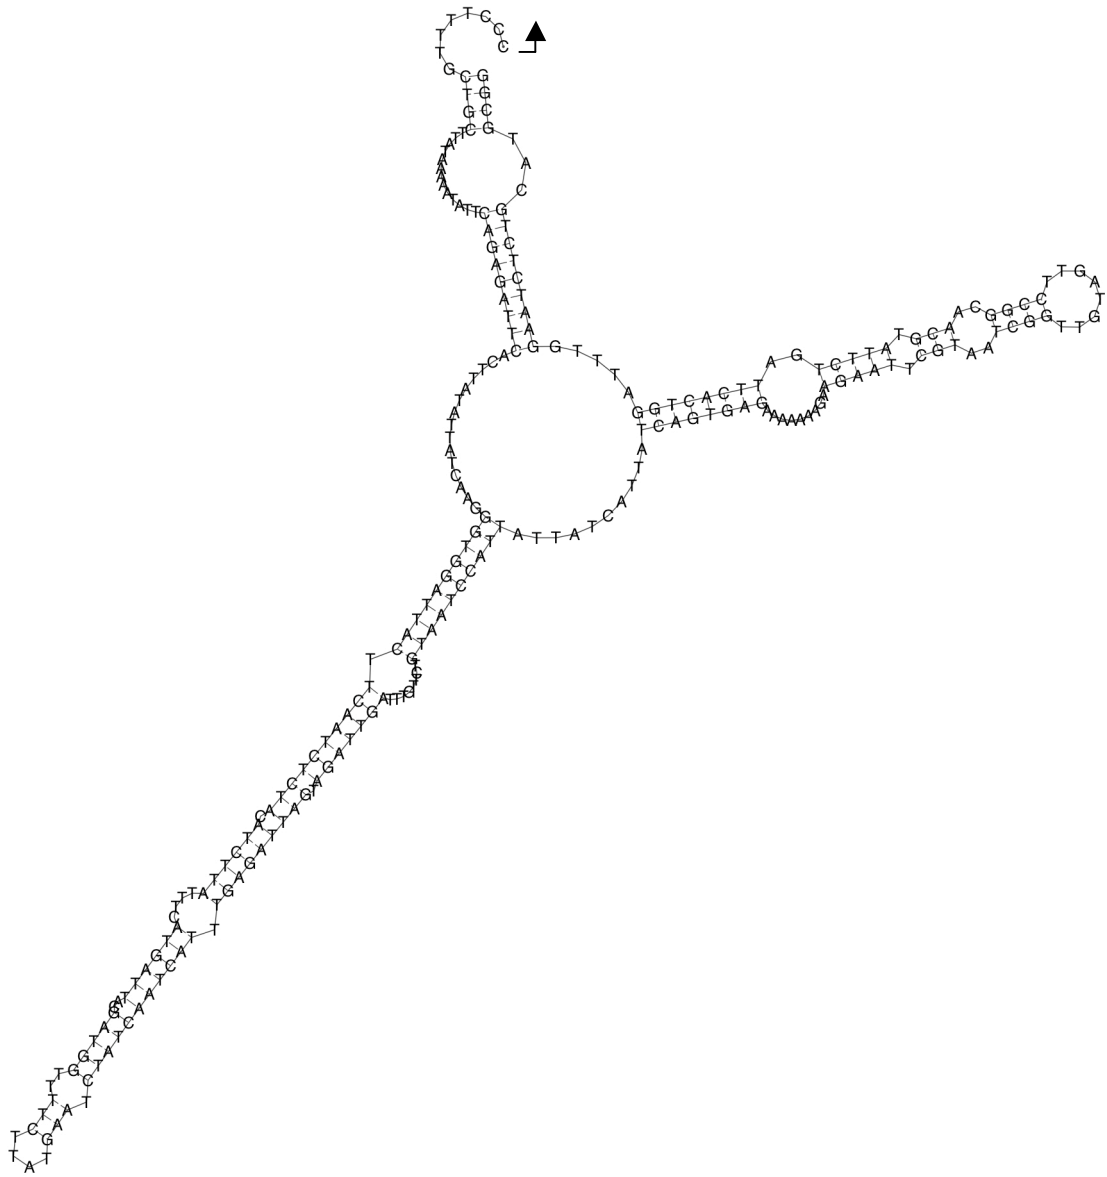

**npcRNA 2 (571-681)**





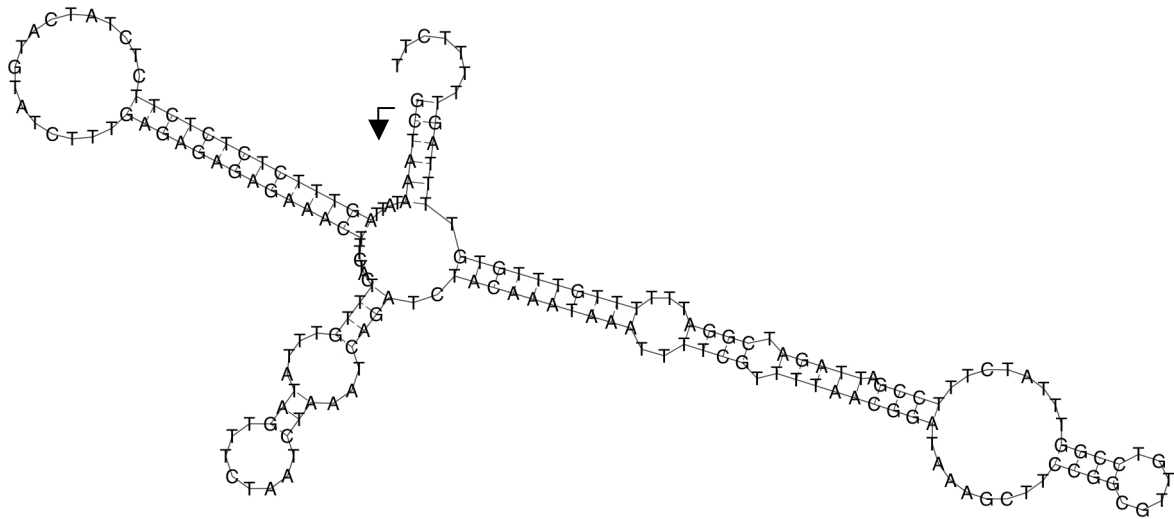

**npcRNA 75 (31-221)**

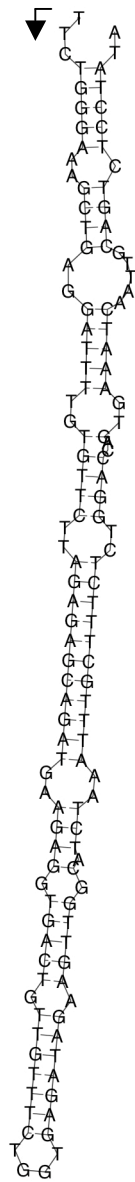

**NpcRNA 78 (261-371)**

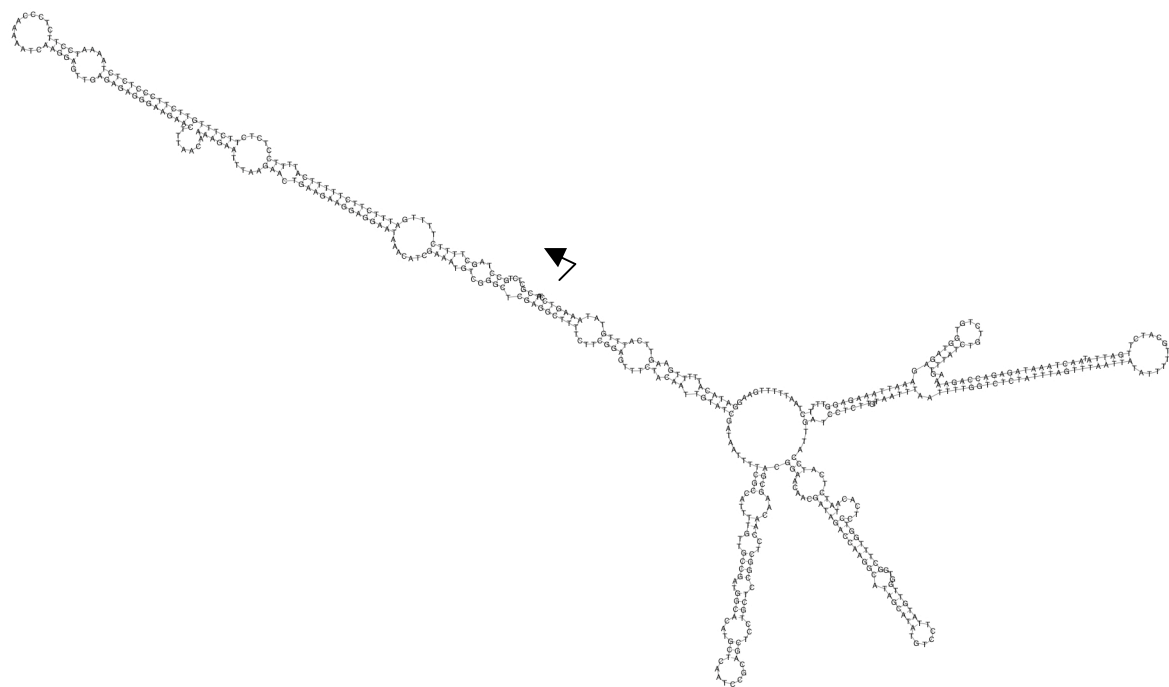

**NpcRNA 82 (381-451)**





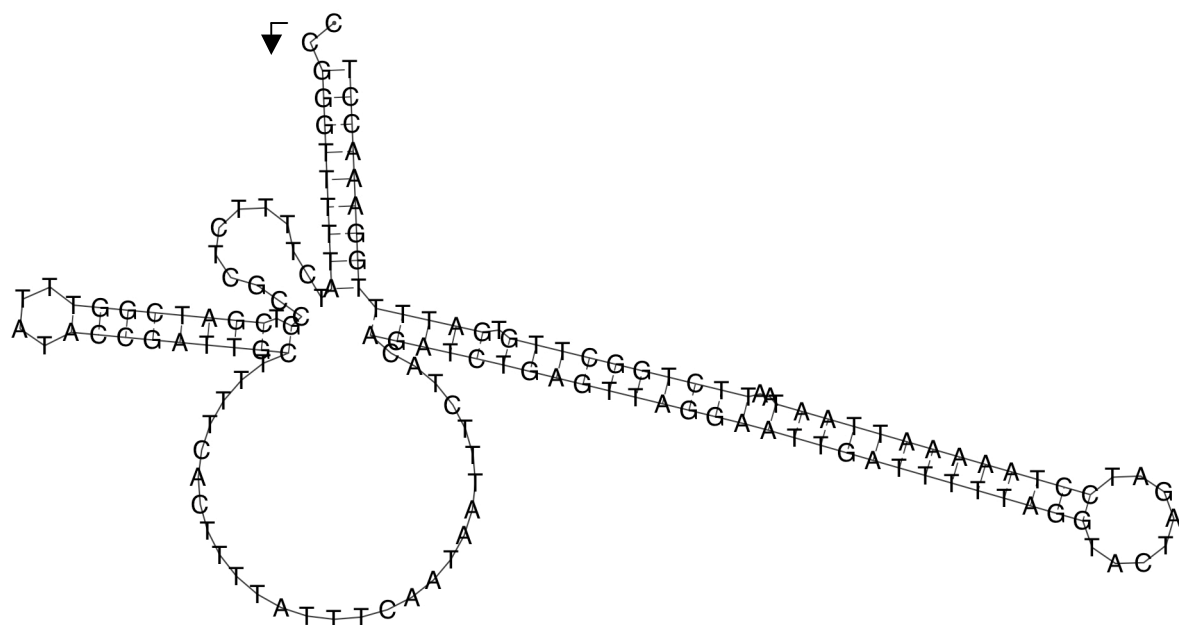

**NpcRNA 150 (291-381)**

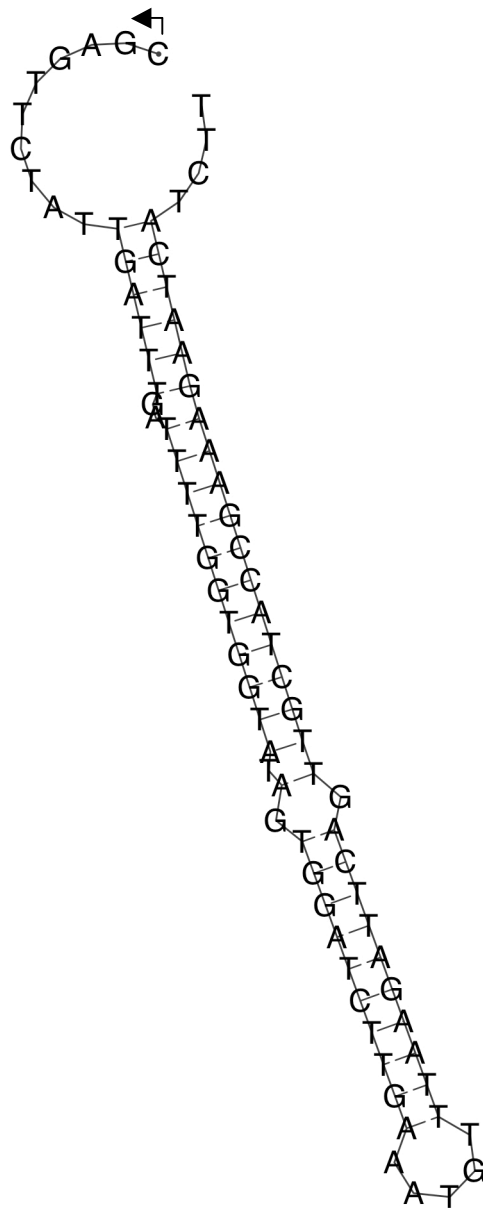

**npcRNA 311 (231-301)**

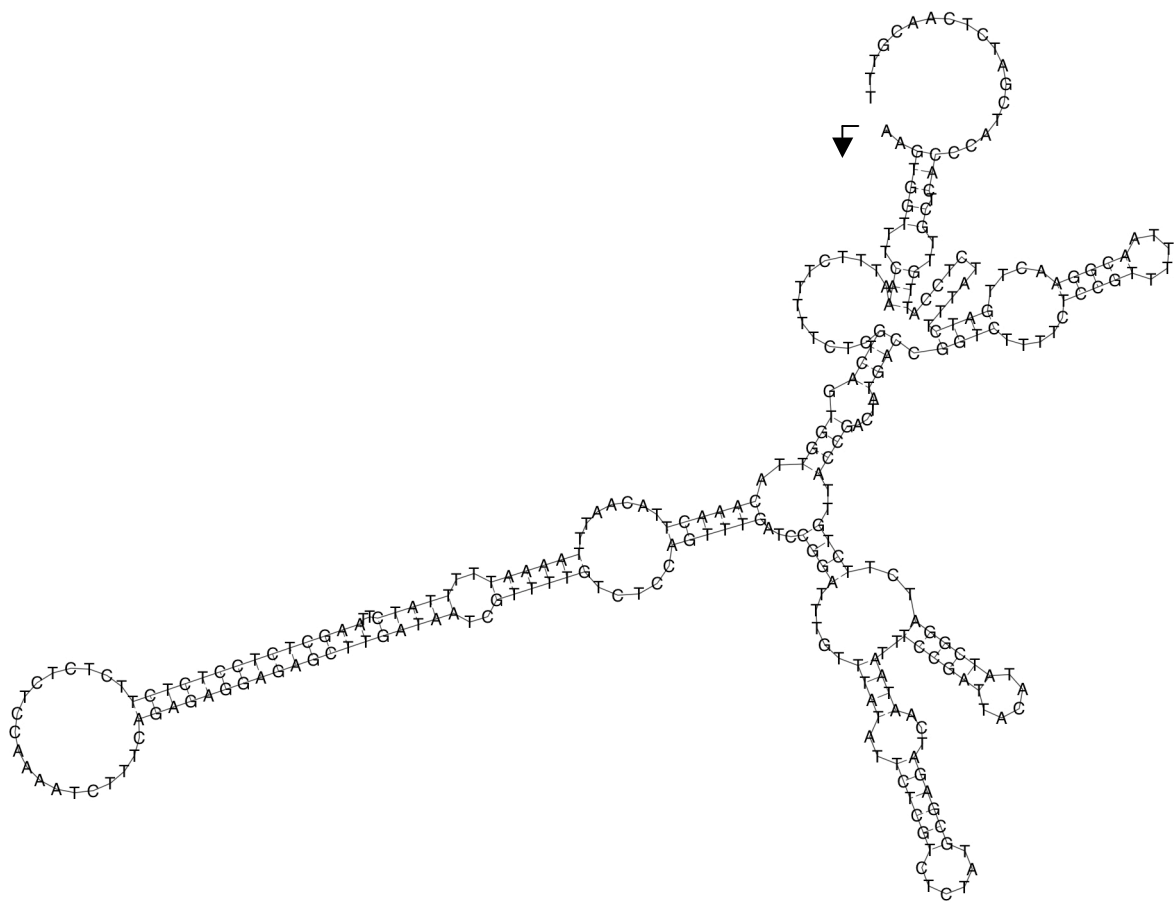

**npcRNA 351 (51-221)**

Supplement: plntphys_pp.105.073817_1.pdf [file plntphys_pp.105.073817_1.pdf]
